# Supplementary material
Source: PubMed Central journal article supplement (PMC3358535)
Supplement: NIHMS366141-supplement-1.pdf [file NIHMS366141-supplement-1.pdf]

| Gene                    | Gene accession number | Forward primer (5' → 3')        | Reverse primer (5' → 3')          |
|-------------------------|-----------------------|---------------------------------|-----------------------------------|
| <i>β-actin</i>          | RefSeq: NM_007393.3   | ggc tcc tag cac cat gaa ga      | gaa agg gtg taa aac gca gc        |
| <i>Il17 (Il17A)</i>     | RefSeq: NM_010552.3   | gct cea gaa ggc ect eag a       | ctt tcc ctc cgc att gac a         |
| <i>Il17f</i>            | RefSeq: NM_013646.1   | cccatgggattacaacatcactc         | cactgggctcagcgatc                 |
| <i>Foxp3</i>            | RefSeq: NM_054039.1   | tcc ttc cea gag ttc ttc ca      | gtc cac act gct ccc ttc tc        |
| <i>Rorc(γ)1</i>         | GI: 5679306           | ccg ctg aga ggg ctt cac         | tgc agg agt agg cca cat tac a     |
| <i>Rora (isoform 4)</i> | RefSeq: NM_013646.1   | tct ccc tgc get ctc cgc ac      | tcc aca gat ctt gca tgg a         |
| <i>Sox3</i>             | RefSeq: NM_007707.3   | ccc tgc ecc agg tcc ttt gc      | gga gcc age gtg gat ctg cg        |
| <i>Irf4</i>             | RefSeq: NM_013674.1   | tga aaa tgg ttg cca ggt gac agg | gca gcc ttc agg gct cgt cg        |
| <i>Il21</i>             | RefSeq: NM_021782.2   | atc ctg aac ttc tat cag ctc cac | gca ttt agc tat gtg ctt ctg ttt c |
| <i>Il23r</i>            | RefSeq: NM_144548.1   | gtc cac caa act tcc caa ga      | ccc gac aaa agt cca atg tc        |
| <i>Il6Ra</i>            | RefSeq: NM_010559.2   | aaa gga gtt cac ggt gtt gct     | ggt tgg cag agt ctt caa cag       |
| <i>Tgfb1</i>            | RefSeq: NM_009370.2   | ata tct gcc ata acc gca ctg     | gtc ctg gca att gtt ctt tga       |

**Supplementary Table I. Primer sequences for quantitative RT-PCR.** The sequences of primers used in SYBR Green-based qRT-PCR analyses.

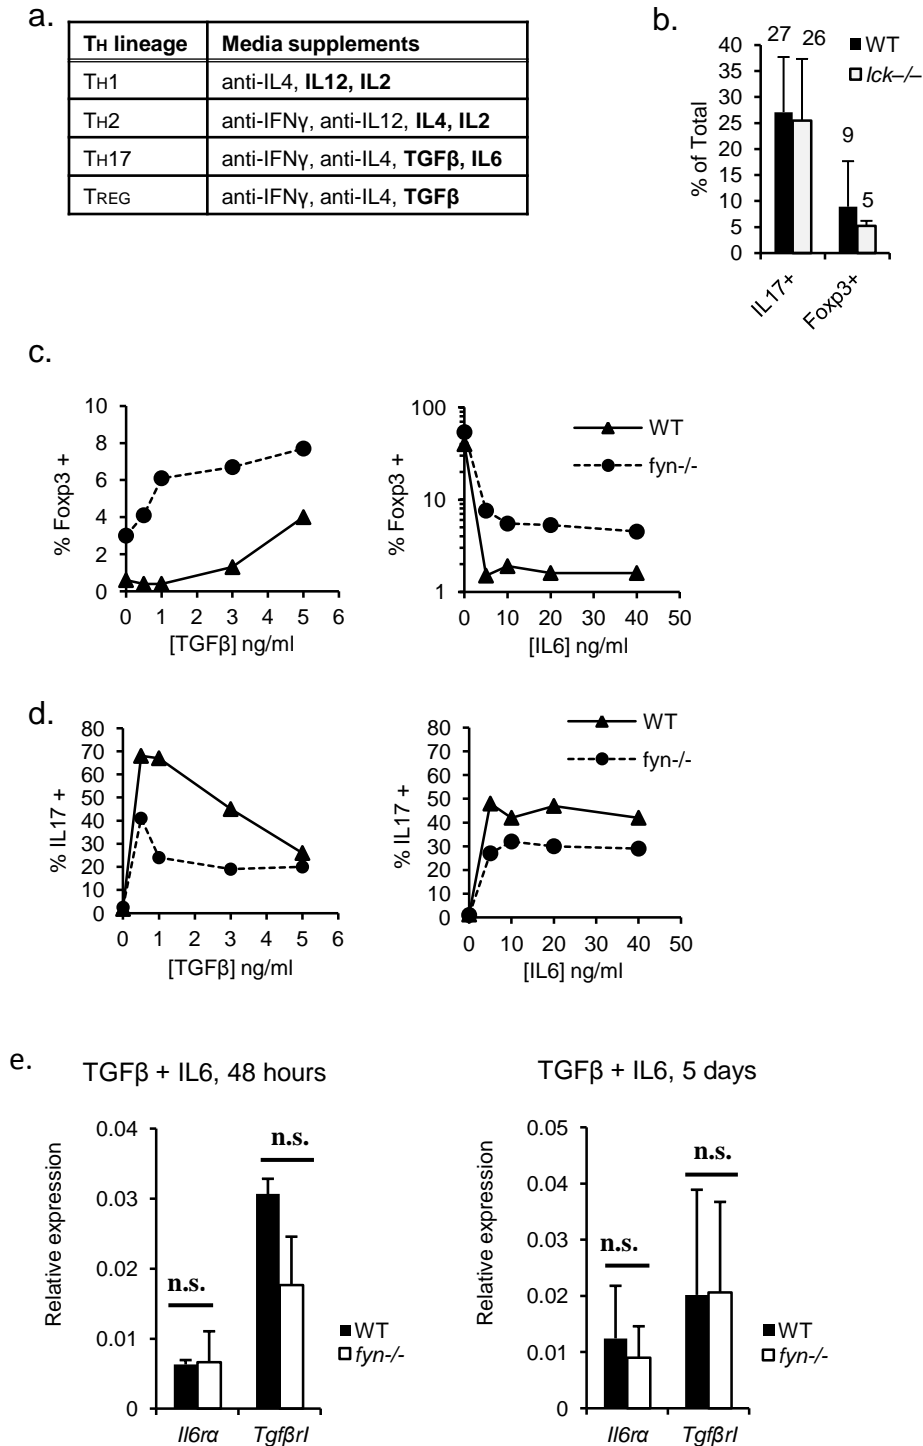

**Supplementary Figure 1.** Fyn deletion alters T<sub>H</sub>17 polarization without affecting IL6 or TGF $\beta$  receptor expression.

**Supplementary Figure 1. Fyn deletion alters T<sub>H</sub>17 polarization without affecting IL6 or TGFβ receptor expression (continued).**

a) Unless otherwise indicated, T<sub>H</sub>17 and T<sub>REG</sub> cultures were polarized in the indicated cytokine milieu for 5 days in the presence of plate-bound anti-TCRβ and anti-CD28. Cells under T<sub>H</sub>1 and T<sub>H</sub>2 conditions were removed from TCRβ/CD28 stimulation on day 4, and cultured for 2 additional days in fresh cytokine-containing media without TCRβ/CD28 stimulation.

b) CD4<sup>+</sup> T-cells lacking Lck produce normal levels of Foxp3 and IL17 under T<sub>H</sub>17-polarizing conditions. WT or *lck*<sup>-/-</sup> CD4<sup>+</sup> splenocytes were skewed in vitro under T<sub>H</sub>17-polarizing conditions. IL17 and Foxp3 expression was analyzed by flow cytometry. Plots are gated on viable singlet CD4<sup>+</sup> events. The quantitation of results from at least six experiments is shown.

c, d) *fyn*<sup>-/-</sup> T<sub>H</sub>17 cells express higher levels of Foxp3 and lower levels of IL17 despite changes in IL6 and TGFβ signal strength. IL6 or TGFβ concentrations were titrated in the T<sub>H</sub>17 skewing of WT or *fyn*<sup>-/-</sup> CD25-depleted CD4<sup>+</sup> splenocytes. During the titration of one cytokine, the concentration of the other cytokine was kept constant at 20ng/ml or 1ng/ml for IL6 or TGFβ, respectively. After 5 days, Foxp3 (d) and IL17 (e) expression was analyzed by intracellular staining and flow cytometry in the viable singlet CD4<sup>+</sup> gate. Results are representative of three experiments.

e) Expression of IL6 and TGFβ receptors is comparable in WT and *fyn*<sup>-/-</sup> T<sub>H</sub>17 cells. At 48 hours (left) and 5 days (right) after the initiation of T<sub>H</sub>17 skewing, the expression of *Il6ra* and *Tgfb1* in WT and *fyn*<sup>-/-</sup> CD4<sup>+</sup> T-cells was determined by qRT-PCR. The average of three experiments is shown; error bars denote one standard deviation from the mean. n.s.: not significant, two-tailed paired Student's t-test.

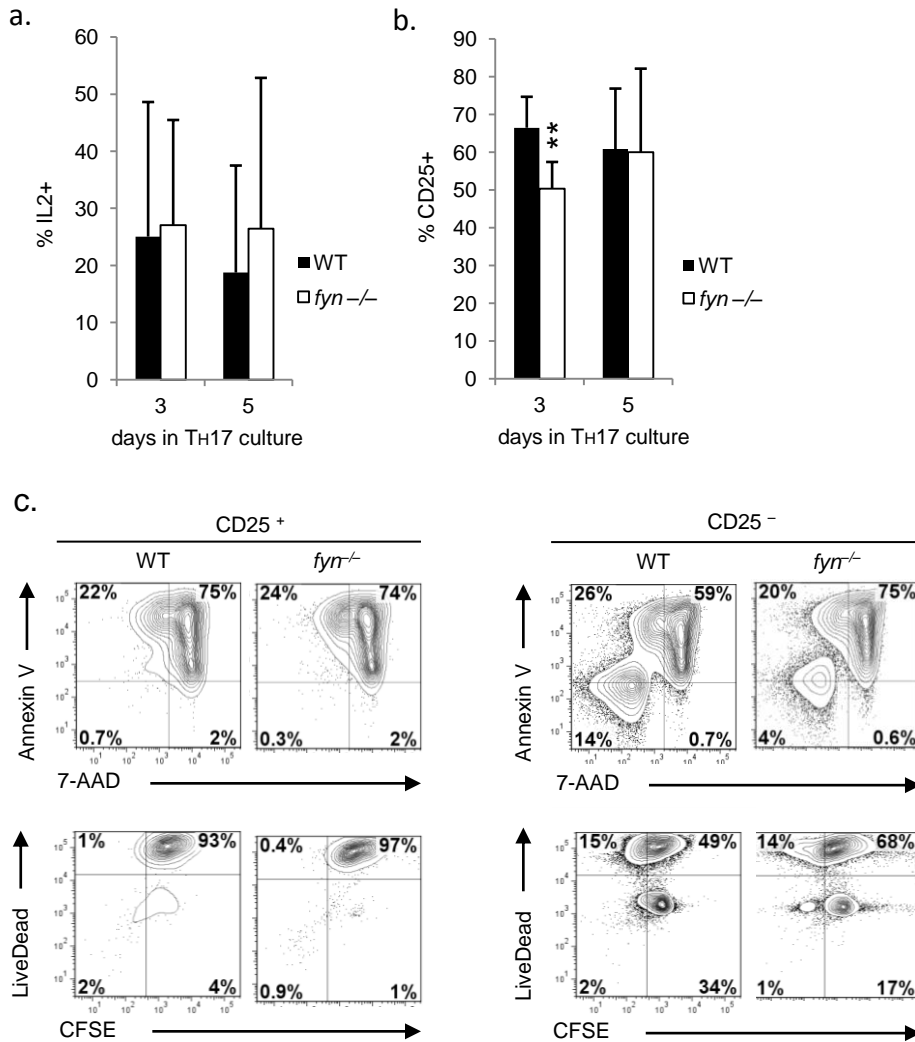

**Supplementary Figure 2. *fyn*<sup>-/-</sup> T<sub>H</sub>17 cells do not have elevated expression of IL2 or the high-affinity IL2-receptor subunit CD25, and exhibit proliferation and survival comparable to WT T<sub>H</sub>17.**

a, b) CD25-depleted CD4<sup>+</sup> splenocytes from WT or *fyn*<sup>-/-</sup> mice were skewed under T<sub>H</sub>17-polarizing conditions. At the indicated timepoints, cells were stimulated with ionomycin and PMA in the presence of a protein transport inhibitor, and IL2 expression was determined by intracellular staining (a). Alternatively, the surface expression of CD25 was assessed on unstimulated cells (b). Plots are gated on viable singlet CD4<sup>+</sup> events. Data is representative of 4 (IL2) or 3 (CD25) independent experiments. Statistical significance between WT and *fyn*<sup>-/-</sup> means was determined by a two-tailed paired Student's t-test; \*\*: p≤0.01.

c) MACS-purified CD25<sup>+</sup> or CD25<sup>-</sup> CD4<sup>+</sup> splenocytes were stained with CFSE and cultured under T<sub>H</sub>17-skewing conditions for 2 days. Apoptosis and cell death were assessed by AnnexinV and 7-AAD staining. Alternatively, viable cells were identified as those with little staining by LiveDead reagent (Invitrogen). Plots are gated on total singlet events. Data is representative of 2 independent experiments.

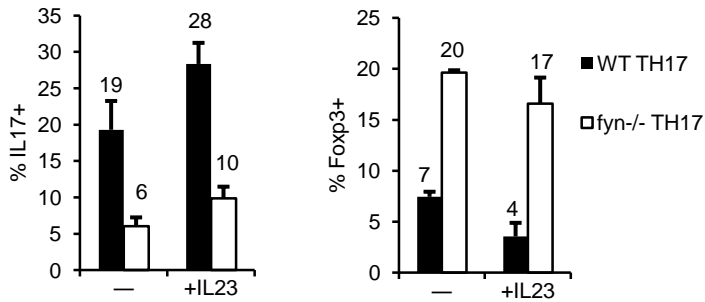

**Supplementary Figure 3. *fyn*<sup>-/-</sup> T<sub>H</sub>17 cells retain IL23 responsiveness.**

The T<sub>H</sub>17-skewing culture of WT and *fyn*<sup>-/-</sup> CD4<sup>+</sup> T-cells was performed with or without the addition of exogenous IL23 (10ng/ml). IL17 and Foxp3 expression was determined by intracellular staining and flow cytometry. Plots are gated on viable singlet CD4<sup>+</sup> events. Numbers above the bars represent the mean value from two experiments, and the error bars denote one standard deviation from the mean.
